# Supplementary figures and images for: Enhanced electrochemiluminescence of luminol by an in situ silver nanoparticle-decorated graphene dot for glucose analysis
Source: Royal Society of Chemistry journal article supplement (doi:10.1039/c7ay02375h), 2018-01-01

Supplementary data

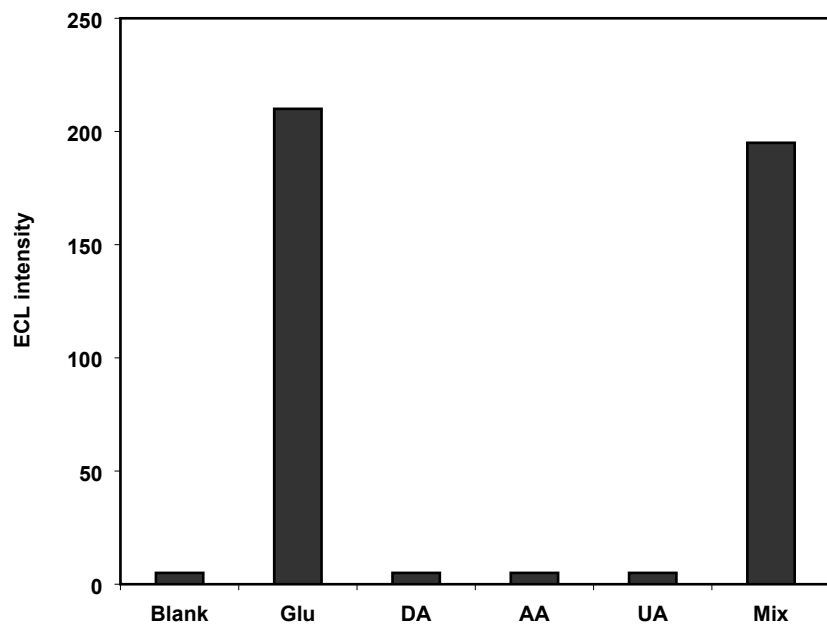

Fig.S1

Supplement: c7ay02375h1.pdf [file c7ay02375h1.pdf]
